# Supplementary material for: Biodistribution of Lentiviral Transduced Adipose-Derived Stem Cells for “Ex-vivo” Regional Gene Therapy for Bone Repair
Source: Research Square preprint supplement (doi:10.21203/rs.3.rs-2653748/v1), 2023-03-20
Supplement: Supplementary file 1 [file 050ca400703769dc6b44a065.xlsx]

## Sheet: Sheet1
	Group/#	Ear Tag	Lung (Norm/Abn)	Notes	GI	Notes	Kidney	Notes	Heart	Notes	Spleen	Notes	Testis	Notes	Liver	Notes	Brain	Notes	Femur Ipsi	Notes	Tibia Ipsi	Notes	Femur Contralateral	Notes
	4D HD-BMP2-1	637R	N	BALT	N		N		N		N		N		N		N		N		N		N
	4D HD-BMP2-2	644L	N	BALT	N		N		N		N		N		N		N		N		N		N
	4D HD-BMP2-3	638R	N		N		N		N		N		N		N		N		N		N		N
	4D HD-BMP2-4	756R	N	BALT	N		N		N		N		N		N		N		N		N		N
	4D HD-BMP2-5	755L	N		N		N		N		N		N		N		N		N		N		N
	4D HD-GFP-1	691R	N		N		N		N		N		N		N		N		N		N		N
	4D HD-GFP-2	692L	N		N		N		N		N		N		N		N		N		N		N
	4D HD-GFP-3	639R	N	BALT	N		N		N		N		N		N		N		N		N		N
	4D HD-GFP-4	720L	N	BALT	N		N		N		N		N		N		N		N		N		N
	4D HD-GFP-5	760R	N		N		N		N		N		N		N		N		N		N		N
	4D SD-BMP2-1	699R	N		N		N		N		N		N		N		N		N		N		N
	4D SD-BMP2-2	696L	N		N		N		N		N		N		N		N		N		N		N
	4D SD-BMP2-3	695R	N	BALT	N		N		N		N		N		N		N		N		N		N
	4D SD-BMP2-4	757R	N		N		N		N		N		N		N		N		N		N		N
	4D SD-BMP2-5	754L	N	BALT	N		N		N		N		N		N		N		N		N		N
	4D SD-GFP-1	698R	N	BALT	N		N		N		N		N		N		N		N		N		N
	4D SD-GFP-2	697L	N		N		N		N		N		N		N		N		N		N		N
	4D SD-GFP-3	677R	N		N		N		N		N		N		N		N		N		N		N
	4D SD-GFP-4	758L	N	BALT	N		N		N		N		N		N		N		N		N		N
	4D SD-GFP-5	759R	N	BALT	N		N		N		N		N		N		N		N		N		N
	4D NT-1	690L	N		N		N		N		N		N		N		N		N		N		N
	4D NT-2	640R	N		N		N		N		N		N		N		N		N		N		N
	4D NT-3	685L	N		N		N		N		N		N		N		N		N		N		N
	4D NT-4	706R	N	BALT	N		N		N		N		N		N		N		N		N		N
	4D NT-5	705L	N		N		N		N		N		N		N		N		N		N		N
	2W HD-BMP2-1	641R	N		N		N		N		N		N		N		N		N		N		N
	2W HD-BMP2-2	710R	N	BALT	N		N		N		N		N		N		N		N		N		N
	2W HD-BMP2-3	642L	N		N		N		N		N		N		N		N		N		N		N
	2W HD-BMP2-4	748R	N		N		N		N		N		N		N		N		N		N		N
	2W HD-BMP2-5	747L	N		N		N		N		N		N		N		N		N		N		N
	2W HD-GFP-1	711R	N		N		N		N		N		N		N		N		N		N		N
	2W HD-GFP-2	712L	N	BALT	N		N		N		N		N		N		N		N		N		N
	2W HD-GFP-3	736R	N	BALT	N		N		N		N		N		N		N		N		N		N
	2W HD-GFP-4	752R	N		N		N		N		N		N		N		N		N		N		N
	2W HD-GFP-5	753L	N		N		N		N		N		N		N		N		N		N		N
	2W SD-BMP2-1	702R	N	BALT	N		N		N		N		N		N		N		N		N		N
	2W SD-BMP2-2	701L	N	BALT	N		N		N		N		N		N		N		N		N		N
	2W SD-BMP2-3	704R	N	BALT	N		N		N		N		N		N		N		N		N		N
	2W SD-BMP2-4	731R	N		N		N		N		N		N		N		N		N		N		N
	2W SD-BMP2-5	745L	N		N		N		N		N		N		N		N		N		N		N
	2W SD-GFP-1	627L	N		N		N		N		N		N		N		N		N		N		N
	2W SD-GFP-2	683R	N	BALT	N		N		N		N		N		N		N		N		N		N
	2W SD-GFP-3	684L	N		N		N		N		N		N		N		N		N		N		N
	2W SD-GFP-4	739L	N	BALT	N		N		N		N		N		N		N		N		N		N
	2W SD-GFP-5	751L	N		N		N		N		N		N		N		N		N		N		N
	2W NT-1	688L	N	BALT	N		N		N		N		N		N		N		N		N		N
	2W NT-2	734R	N		N		N		N		N		N		N		N		N		N		N
	2W NT-3	741L	N	BALT	N		N		N		N		N		N		N		N		N		N
	2W NT-4	742R	N		N		N		N		N		N		N		N		N		N		N
	2W NT-5	740L	N		N		N		N		N		N		N		N		N		N		N
	8W HD-BMP2-1	783R	N		N		N		N		N		N		N		N		N		N		N
	8W HD-BMP2-2	786L	N	BALT	N		N		N		N		N		N		N		N		N		N
	8W HD-BMP2-3	784R	N	BALT	N		N		N		N		N		N		N		N		N		N
	8W HD-BMP2-4	913L	N		N		N		N		N		N		N		N		N		N		N
	8W HD-BMP2-5	951R	N		N		N		N		N		N		N		N		N		N		N
	8W HD-GFP-1	779R	N		N		N		N		N		N		N		N		N		N		N
	8W HD-GFP-2	778L	N		N		N		N		N		N		N		N		N		N		N
	8W HD-GFP-3	781R	N		N		N		N		N		N		N		N		N		N		N
	8W HD-GFP-4	941R	N		N		N		N		N		N		N		N		N		N		N
	8W HD-GFP-5	932L	N		N		N		N		N		N		N		N		N		N		N
	8W SD-BMP2-1	785L	N		N		N		N		N		N		N		N		N		N		N
	8W SD-BMP2-2	782R	N	BALT	N		N		N		N		N		N		N		N		N		N
	8W SD-BMP2-3	787L	N	BALT	N		N		N		N		N		N		N		N		N		N
	8W SD-BMP2-4	820R	N		N		N		N		N		N		N		N		N		N		N
	8W SD-BMP2-5	914L	N		N		N		N		N		N		N		N		N		N		N
	8W SD-GFP-1	780L	N		N		N		N		N		N		N		N		N		N		N
	8W SD-GFP-2	776R	N		N		N		N		N		N		N		N		N		N		N
	8W SD-GFP-3	777L	N		N		N		N		N		N		N		N		N		N		N
	8W SD-GFP-4	922R	N		N		N		N		N		N		N		N		N		N		N
	8W SD-GFP-5	915L	N		N		N		N		N		N		N		N		N		N		N
	8W NT-1	911R	N	BALT	N		N		N		N		N		N		N		N		N		N
	8W NT-2	925L	N		N		N		N		N		N		N		N		N		N		N
	8W NT-3	934R	N		N		N		N		N		N		N		N		N		N		N
	8W NT-4	909R	N		N		N		N		N		N		N		N		N		N		N
	8W NT-5	964L	N		N		N		N		N		N		N		N		N		N		N
	12W HD-BMP2-1	801R	N		N		N		N		N		N		N		N		N		N		N
	12W HD-BMP2-2	802L	N		N		N		N		N		N		N		N		N		N		N
	12W HD-BMP2-3	869R	N		N		N		N		N		N		N		N		N		N		N
	12W HD-BMP2-4	908R	N		N		N		N		N		N		N		N		N		N		N
	12W HD-BMP2-5	906L	N	BALT	N		N		N		N		N		N		N		N		N		N
	12W HD-GFP-1	825R	N		N		N		N		N		N		N		N		N		N		N
	12W HD-GFP-2	826L	N		N		N		N		N		N		N		N		N		N		N
	12W HD-GFP-3	827R	N		N		N		N		N		N		N		N		N		N		N
	12W HD-GFP-4	862R	N		N		N		N		N		N		N		N		N		N		N
	12W HD-GFP-5	918L	N		N		N		N		N		N		N		N		N		N		N
	12W SD-BMP2-1	870R	N		N		N		N		N		N		N		N		N		N		N
	12W SD-BMP2-2	868L	N		N		N		N		N		N		N		N		N		N		N
	12W SD-BMP2-3	893L	N		N		N		N		N		N		N		N		N		N		N
	12W SD-BMP2-4	846R	N		N		N		N		N		N		N		N		N		N		N
	12W SD-BMP2-5	845L	N		N		N		N		N		N		N		N		N		N		N
	12W SD-GFP-1	828L	N		N		N		N		N		N		N		N		N		N		N
	12W SD-GFP-2	829R	N		N		N		N		N		N		N		N		N		N		N
	12W SD-GFP-3	863R	N		N		N		N		N		N		N		N		N		N		N
	12W SD-GFP-4	936R	N		N		N		N		N		N		N		N		N		N		N
	12W SD-GFP-5	930L	N		N		N		N		N		N		N		N		N		N		N
	12W NT-1	864L	N		N		N		N		N		N		N		N		N		N		N
	12W NT-2	903R	N		N		N		N		N		N		N		N		N		N		N
	12W NT-3	904L	N		N		N		N		N		N		N		N		N		N		N
	12W NT-4	902R	N	BALT	N		N		N		N		N		N		N		N		N		N
	12W NT-5	905L	N	BALT	N		N		N		N		N		N		N		N		N		N
