# Supplementary material for: Biodistribution of Lentiviral Transduced Adipose-Derived Stem Cells for “Ex-vivo” Regional Gene Therapy for Bone Repair
Source: Research Square preprint supplement (doi:10.21203/rs.3.rs-2653748/v1), 2023-03-20
Supplement: Supplementary file 2 [file 8e79e36a64df9d722892b9a7.docx]

Table 1. PCR primes and probes

| **HIV Psi** | |
| --- | --- |
| Forward primer | 5’- AAG TAG TGT GTG CCC GTC TG -3’ |
| Reverse primer | 5’- CCT CTG GTT TCC CTT TCG CT -3’ |
| Probe | 5'- FAM- CCC TCA GAC -ZEN- CCT TTT AGT CAG TGT GGA AAA TCT CTA G -IBFQ -3' |
| **SDC4** | |
| Forward primer | 5'- CAG GGT CTG GGA GCC AAG T -3' |
| Reverse primer | 5'- GCA CAG TGC TGG ACA TTG ACA -3' |
| Probe | 5'- HEX- CCC ACC GAA -ZEN- CCC AAG AAA CTA GAG GAG AAT -IBFQ* -3' |

*IBFQ=Iowa Black® FQ dark quencher, ZEN=internal quencher

Quencher modification from IDT-Integrated DNA Technologies
