# Supplementary material for: Biodistribution of Lentiviral Transduced Adipose-Derived Stem Cells for “Ex-vivo” Regional Gene Therapy for Bone Repair
Source: Research Square preprint supplement (doi:10.21203/rs.3.rs-2653748/v1), 2023-03-20
Supplement: Supplementary file 3 [file a2ec7131e8a6e104dc311085.xlsx]

## Sheet: Sheet1
	Table 4. High-dose GFP Group (15x10^6 cells): Tissue distribution of TSTA lentiviral vector system in rats at 4, 14, 56 and 84 days post-implantation time points.
	Group Rat #	Defect Site	Brain	Lung	Heart	GI	Liver	Spleen	Kidney	Testis	BM	Blood
	I (4 days)
	1	11300	UD	UD	1.4	UD	UD	1	UD	1.2	1.2	UD
	2	8730	UD	UD	UD	2.3	UD	1.5	0.8	0.7	1.3	UD
	3	4720	UD	UD	1.5	UD	UD	UD	UD	UD	UD	3.1
	4	65400	1.4	UD	UD	UD	1.5	UD	2.3	UD	1.5	UD
	5	39250	UD	2.1	2.6	2.1	2.1	1.4	UD	2.1	2	2.1
	II (14 days)
	1	1357	UD	UD	UD	UD	UD	UD	UD	UD	UD	UD
	2	268	UD	1	UD	UD	UD	UD	UD	UD	UD	UD
	3	1554	UD	UD	UD	UD	UD	UD	UD	UD	UD	UD
	4	673	UD	UD	UD	UD	UD	UD	1	UD	UD	UD
	5	138	1.3	UD	UD	UD	UD	UD	UD	UD	UD	UD
	III (56 days)
	1	2.6	UD	UD	UD	UD	UD	UD	UD	UD	UD	UD
	2	694	UD	UD	UD	UD	UD	UD	UD	UD	UD	UD
	3	2240	UD	UD	UD	UD	UD	UD	UD	UD	UD	UD
	4	1.5	UD	UD	UD	UD	UD	UD	UD	UD	UD	UD
	5	0	UD	UD	UD	UD	UD	UD	UD	UD	UD	UD
	IV (84 days)
	1	0	UD	UD	UD	1.5	UD	UD	UD	UD	UD	UD
	2	2.7	UD	UD	UD	UD	UD	UD	UD	UD	UD	UD
	3	0	UD	UD	UD	UD	UD	UD	UD	UD	UD	UD
	4	0	UD	UD	UD	UD	UD	UD	UD	UD	UD	UD
	5	0	UD	UD	UD	UD	UD	UD	UD	UD	UD	UD
	GI: Gastrointestinal; BM: Bone marrow; UD: undetectable.
