# Supplementary material for: Biodistribution of Lentiviral Transduced Adipose-Derived Stem Cells for “Ex-vivo” Regional Gene Therapy for Bone Repair
Source: Research Square preprint supplement (doi:10.21203/rs.3.rs-2653748/v1), 2023-03-20
Supplement: Supplementary file 4 [file d1705eaef3a8d0a322d516ae.xlsx]

## Sheet: Sheet1
	Table 3. Standard-dose GFP Group (5x10^6 cells): Tissue distribution of TSTA lentiviral vector system in rats at 4, 14, 56 and 84 days post-implantation time points.
	Group Rat #	Defect Site	Brain	Lung	Heart	GI	Liver	Spleen	Kidney	Testis	BM	Blood
	I (4 days)
	1	7590	UD	1.4	2.3	UD	UD	UD	1.3	UD	1	UD
	2	14380	UD	UD	UD	UD	2.9	UD	UD	UD	UD	UD
	3	22850	2.1	UD	UD	UD	1.2	UD	1.6	UD	UD	2
	4	42940	UD	UD	UD	1.2	UD	UD	UD	UD	UD	UD
	5	51700	UD	UD	UD	UD	UD	UD	UD	UD	1.6	1.2
	II (14 days)
	1	1023	UD	UD	UD	UD	UD	UD	UD	UD	UD	UD
	2	1354	UD	1	UD	UD	UD	UD	UD	UD	UD	UD
	3	5.1	UD	UD	UD	UD	UD	UD	UD	UD	UD	UD
	4	5.1	UD	UD	UD	UD	UD	UD	1	UD	UD	UD
	5	2000	1.3	UD	UD	UD	UD	UD	UD	UD	UD	UD
	III (56 days)
	1	5.3	UD	UD	UD	UD	UD	UD	UD	UD	UD	UD
	2	119	UD	UD	UD	UD	UD	UD	UD	UD	UD	UD
	3	78	UD	UD	UD	UD	UD	UD	UD	UD	UD	UD
	4	0	UD	UD	UD	UD	UD	UD	UD	UD	UD	UD
	5	3.9	UD	UD	UD	UD	UD	UD	UD	UD	UD	UD
	IV (84 days)
	1	0	UD	UD	UD	UD	UD	UD	UD	UD	UD	UD
	2	0	UD	UD	UD	UD	UD	UD	UD	UD	UD	UD
	3	1.4	UD	UD	UD	UD	UD	UD	UD	UD	UD	UD
	4	0	UD	UD	UD	UD	UD	UD	UD	UD	UD	UD
	5	6.9	UD	UD	UD	UD	UD	UD	UD	UD	UD	UD
	GI: Gastrointestinal; BM: Bone marrow; UD: undetectable.
