# Supplementary material for: Biodistribution of Lentiviral Transduced Adipose-Derived Stem Cells for “Ex-vivo” Regional Gene Therapy for Bone Repair
Source: Research Square preprint supplement (doi:10.21203/rs.3.rs-2653748/v1), 2023-03-20
Supplement: Supplementary file 5 [file e432d612dea9cd20585c8006.xlsx]

## Sheet: Sheet1
	Table 1. Standard-dose BMP Group (5x10^6 cells): Tissue distribution of TSTA lentiviral vector system in rats at 4, 14, 56 and 84 days post-implantation time points.
	Group Rat #	Defect Site	Brain	Lung	Heart	GI	Liver	Spleen	Kidney	Testis	BM	Blood
	I (4 days)
	1	9890	UD	1.4	UD	UD	UD	UD	0.8	0.8	0.8	2.2
	2	12620	UD	1.3	UD	UD	UD	UD	0.8	2.3	2.8	UD
	3	22870	UD	1.4	UD	1.4	1.5	UD	UD	2.2	UD	1.4
	4	16320	1.4	UD	1.4	UD	UD	UD	1.4	UD	2.8	1.4
	5	17060	UD	2.7	2.2	1.4	UD	UD	UD	UD	UD	2.2
	II (14 days)
	1	103	UD	UD	UD	UD	UD	UD	1	UD	UD	UD
	2	90	UD	UD	UD	UD	UD	UD	UD	UD	UD	1
	3	74	UD	UD	UD	1	UD	UD	UD	UD	UD	UD
	4	9.1	UD	UD	UD	UD	UD	UD	UD	UD	UD	UD
	5	241	UD	UD	UD	UD	UD	UD	UD	UD	UD	UD
	III (56 days)
	1	0	UD	UD	UD	UD	UD	UD	UD	UD	UD	UD
	2	0	UD	UD	UD	UD	UD	UD	UD	UD	UD	UD
	3	0	UD	UD	UD	UD	UD	UD	UD	UD	UD	UD
	4	0	UD	UD	UD	UD	UD	UD	UD	UD	UD	UD
	5	0	UD	UD	UD	UD	UD	UD	UD	UD	UD	UD
	IV (84 days)
	1	2	UD	UD	UD	UD	UD	UD	UD	UD	UD	UD
	2	1.4	UD	UD	UD	UD	UD	UD	UD	UD	UD	UD
	3	0	UD	UD	UD	UD	UD	UD	UD	UD	UD	UD
	4	0	UD	UD	UD	UD	UD	UD	UD	UD	UD	UD
	5	0	UD	UD	UD	UD	UD	1	UD	UD	UD	UD
	GI: Gastrointestinal; BM: Bone marrow; UD: undetectable.
