# Supplementary material for: Biodistribution of Lentiviral Transduced Adipose-Derived Stem Cells for “Ex-vivo” Regional Gene Therapy for Bone Repair
Source: Research Square preprint supplement (doi:10.21203/rs.3.rs-2653748/v1), 2023-03-20
Supplement: Supplementary file 6 [file e6a2c14de270ccdb4fe6f263.xlsx]

## Sheet: Sheet1
	Table 2. High-dose BMP Group (15x10^6 cells): Tissue distribution of TSTA lentiviral vector system in rats at 4, 14, 56 and 84 days post-implantation time points.
	Group Rat #	Defect Site	Brain	Lung	Heart	GI	Liver	Spleen	Kidney	Testis	BM	Blood
	I (4 days)
	1	3930	UD	UD	UD	UD	UD	UD	UD	UD	UD	1.9
	2	5260	UD	UD	UD	UD	UD	UD	UD	1.3	UD	UD
	3	8970	UD	UD	UD	UD	UD	UD	UD	UD	UD	UD
	4	16730	UD	UD	UD	UD	UD	UD	UD	UD	UD	UD
	5	10390	UD	UD	UD	UD	UD	UD	UD	UD	UD	UD
	II (14 days)
	1	1008	UD	UD	UD	UD	UD	UD	UD	UD	UD	UD
	2	197	UD	UD	UD	UD	UD	UD	UD	UD	UD	UD
	3	723	UD	UD	UD	UD	UD	UD	UD	UD	UD	UD
	4	1106	UD	UD	UD	UD	UD	UD	UD	UD	UD	UD
	5	626	UD	UD	UD	UD	UD	UD	UD	UD	UD	UD
	III (56 days)
	1	0	UD	UD	UD	UD	UD	UD	UD	UD	UD	UD
	2	4.8	UD	UD	UD	UD	UD	UD	UD	UD	UD	UD
	3	1.3	UD	UD	UD	UD	UD	UD	UD	UD	UD	UD
	4	2.5	UD	UD	UD	UD	UD	UD	UD	UD	UD	UD
	5	4.4	UD	UD	UD	UD	UD	UD	UD	UD	UD	UD
	IV (84 days)
	1	2.2	UD	UD	UD	UD	UD	UD	UD	UD	UD	UD
	2	4.1	UD	UD	UD	UD	UD	UD	UD	UD	UD	UD
	3	0	UD	UD	UD	UD	UD	UD	UD	UD	UD	UD
	4	0	UD	UD	UD	UD	UD	UD	UD	UD	UD	UD
	5	1.5	UD	UD	UD	UD	UD	UD	UD	UD	UD	UD
	GI: Gastrointestinal; BM: Bone marrow; UD: undetectable.
